# Supplementary material
Source: PubMed Central journal article supplement (PMC5528512)

# Before treatment

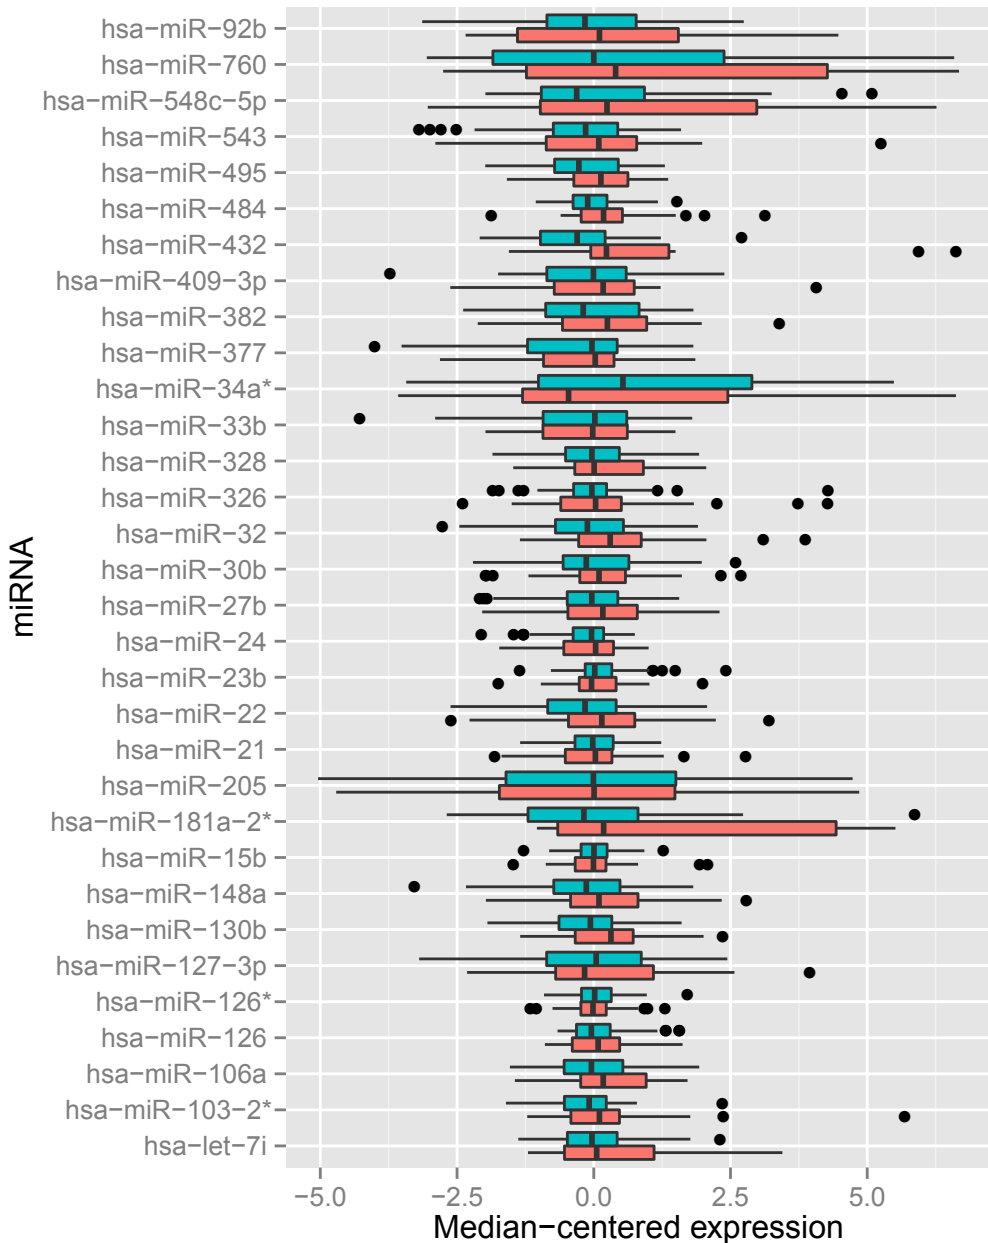

Median-centered miRNA expression in responders (green) and non-responders (red) before treatment in the validation study. miR-106a, miR-484, and miR-130b are significantly ( $p < 0.01$ ) upregulated in non-responders (logistic regression).

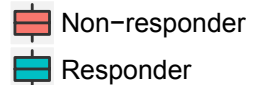

Supplement: MOL2-8-059-s001.pdf [file MOL2-8-059-s001.pdf]
