# Supplementary material
Source: PubMed Central journal article supplement (PMC5528512)

# After treatment

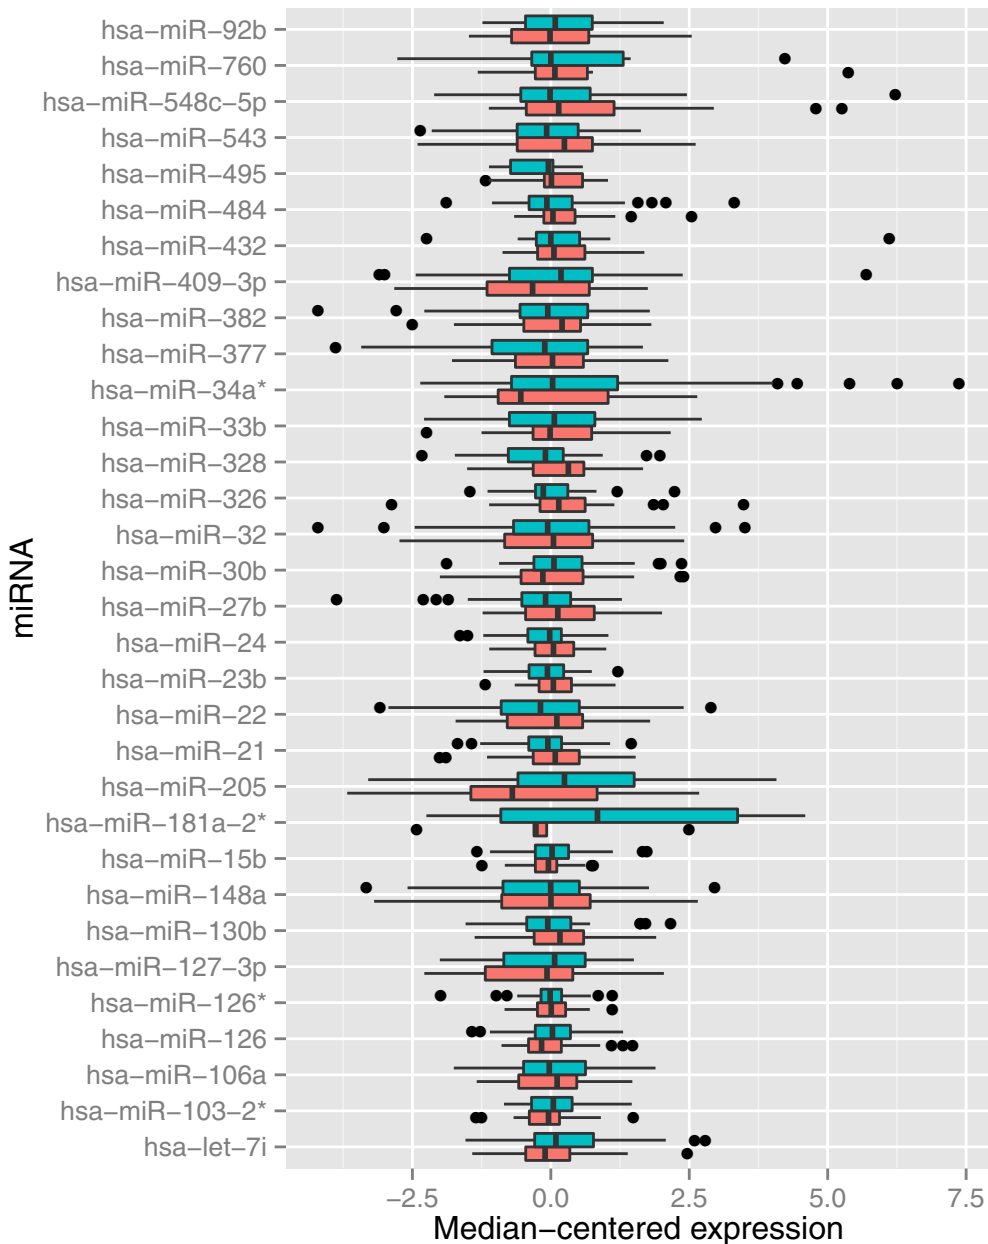

Median-centered miRNA expression in responders (green) and non-responders (red) after treatment in the validation study. No miRNAs were significantly ( $p < 0.01$ ) differentially expressed between responders and non-responders (logistic regression).

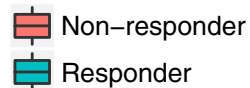

Supplement: MOL2-8-059-s006.pdf [file MOL2-8-059-s006.pdf]
