# Supplementary material
Source: PubMed Central journal article supplement (PMC5528512)

# Progression-free survival

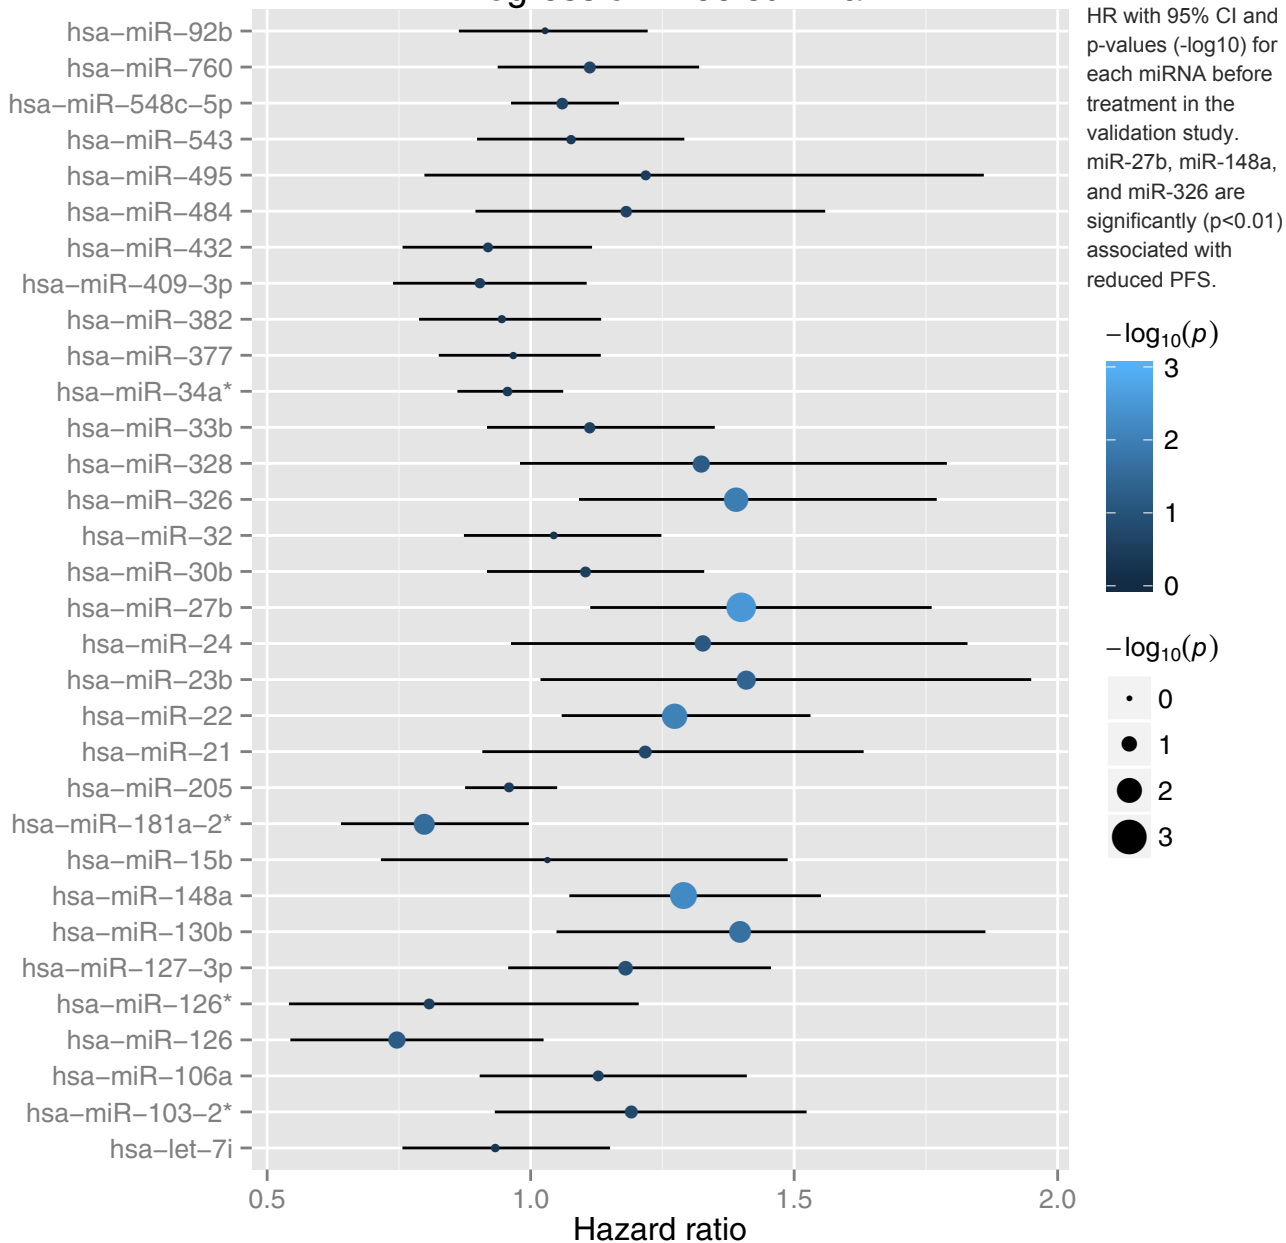

Supplement: MOL2-8-059-s004.pdf [file MOL2-8-059-s004.pdf]

# Overall survival

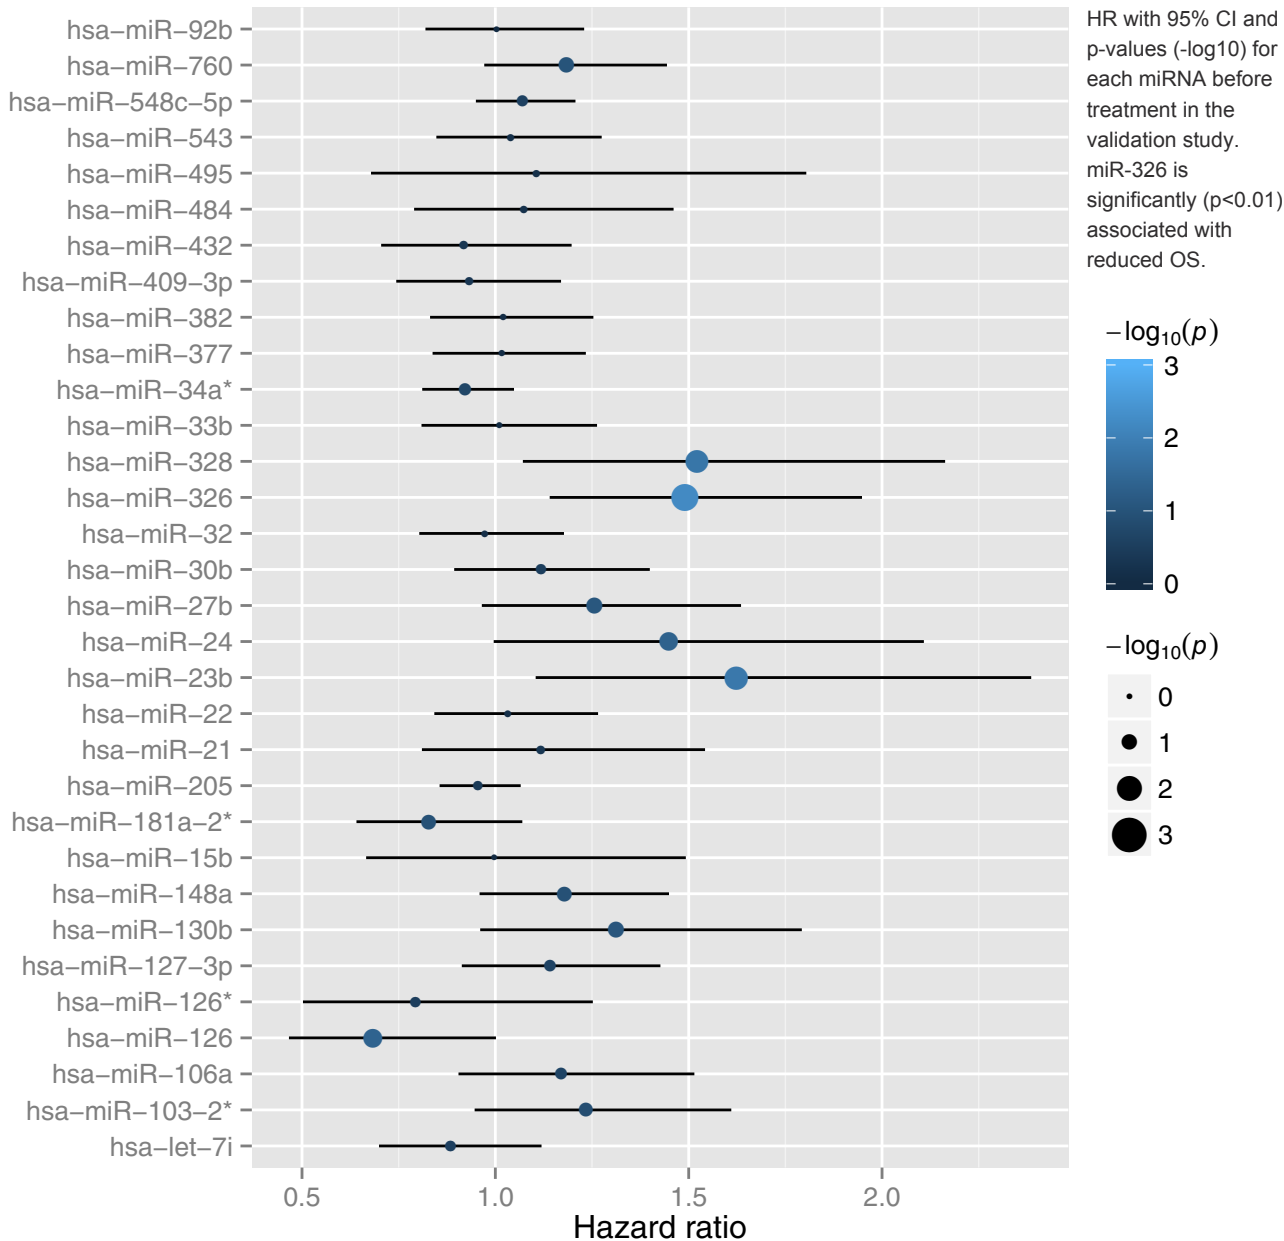

Supplement: MOL2-8-059-s005.pdf [file MOL2-8-059-s005.pdf]

# Progression-free survival

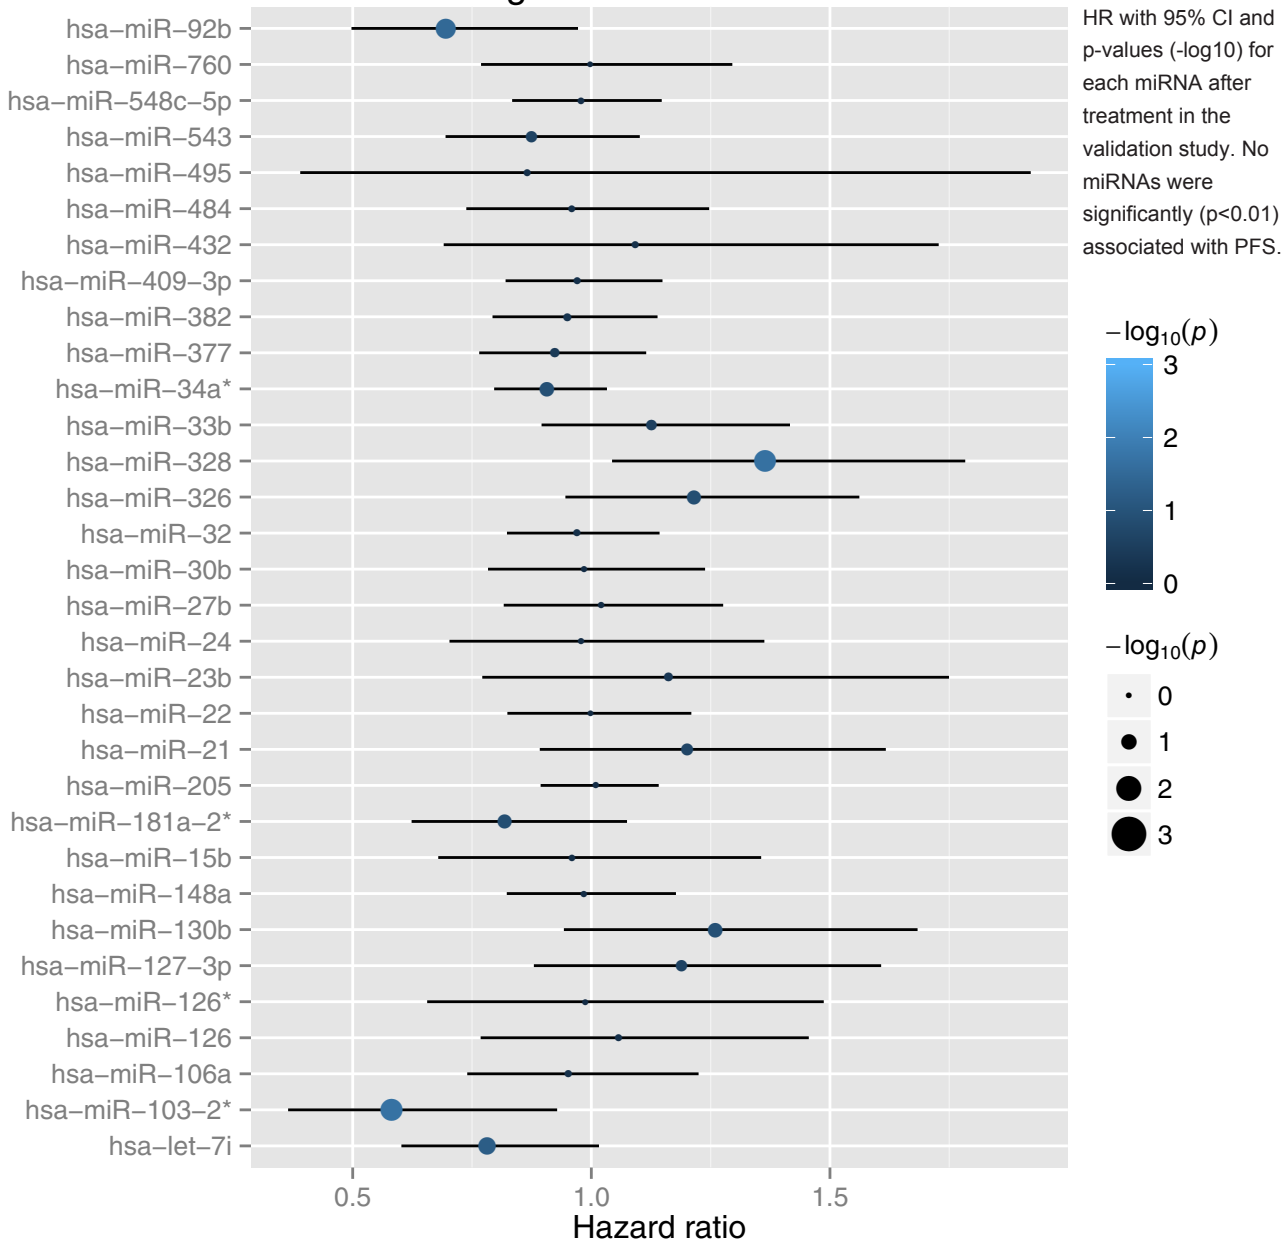

Supplement: MOL2-8-059-s007.pdf [file MOL2-8-059-s007.pdf]

# Overall survival

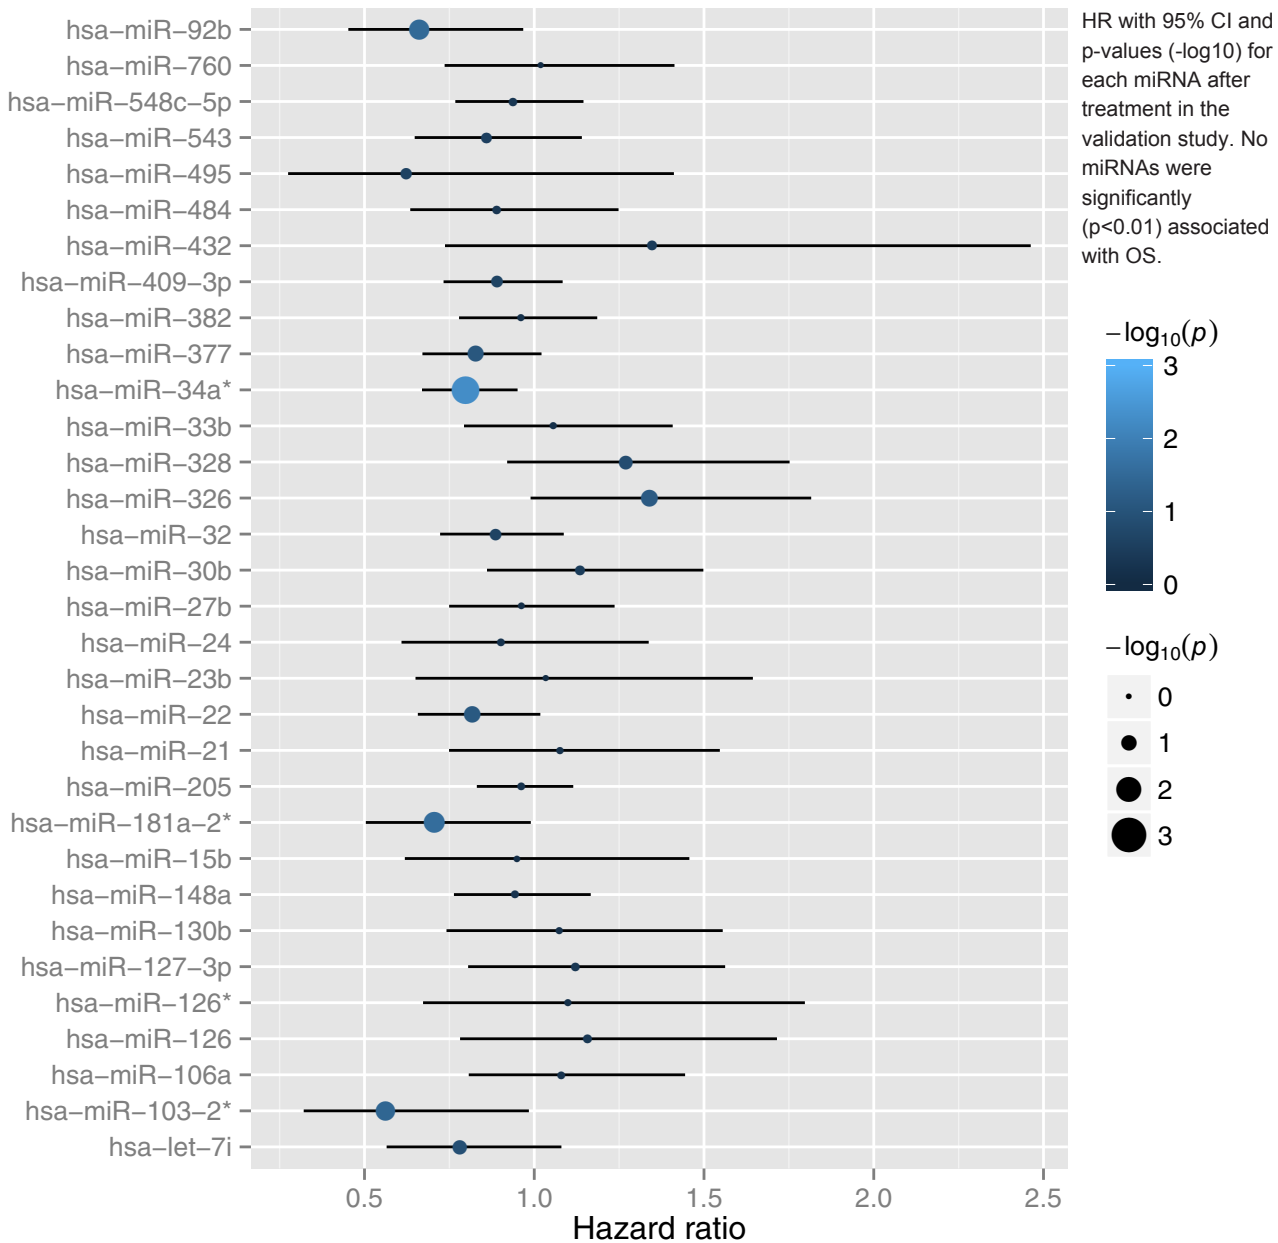

Supplement: MOL2-8-059-s008.pdf [file MOL2-8-059-s008.pdf]
